# Supplementary figures and images for: Magnetism-induced topological transition in EuAs3
Source: Research Square preprint supplement (doi:10.21203/rs.3.rs-100461/v1), 2020-11-09

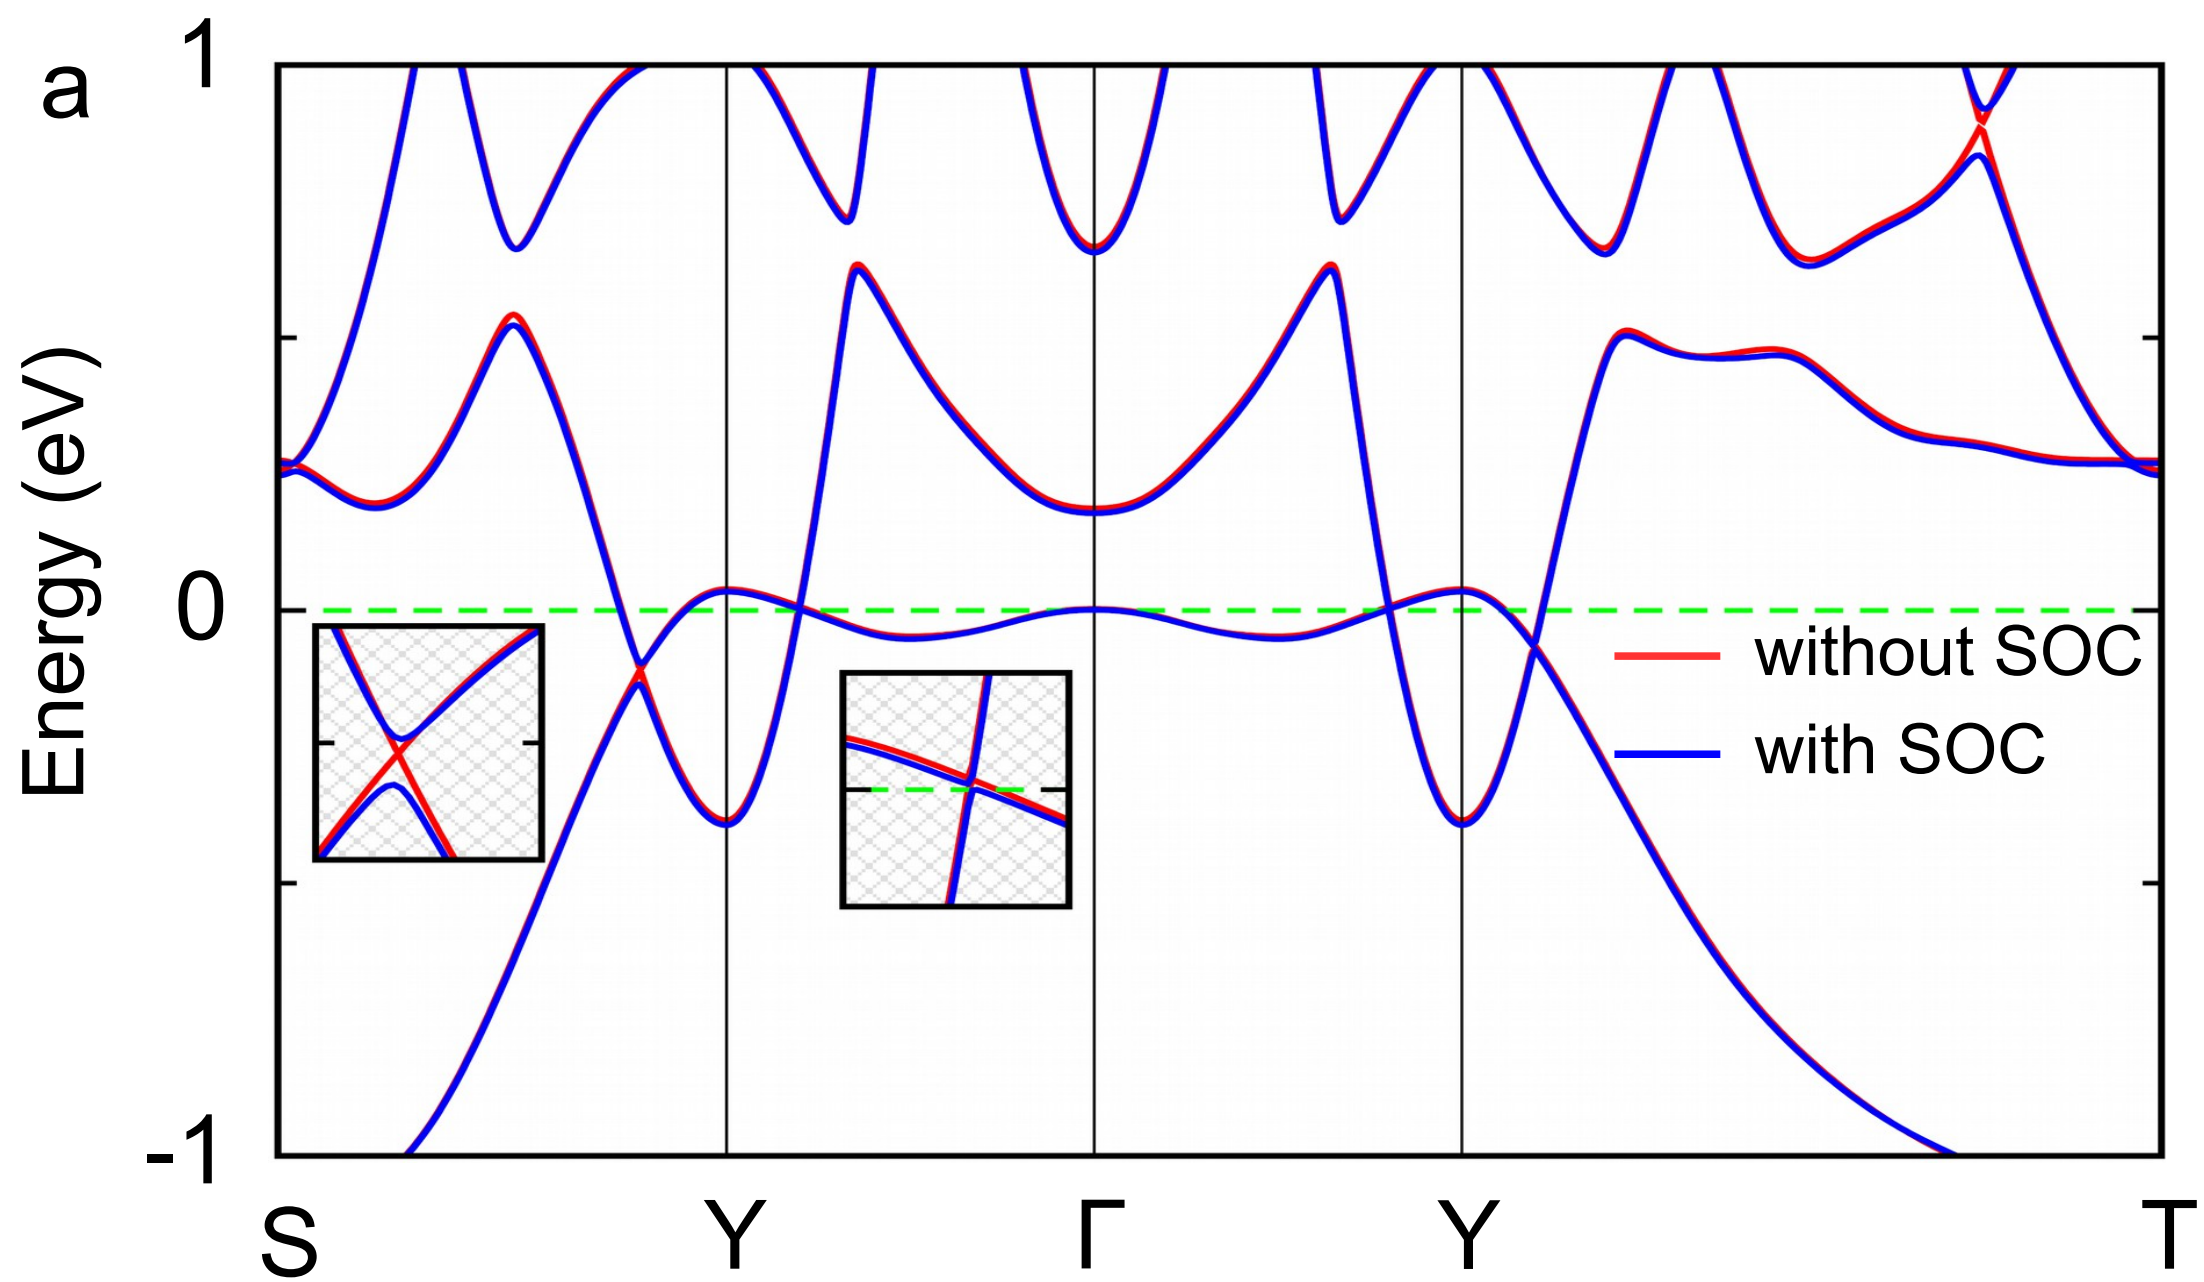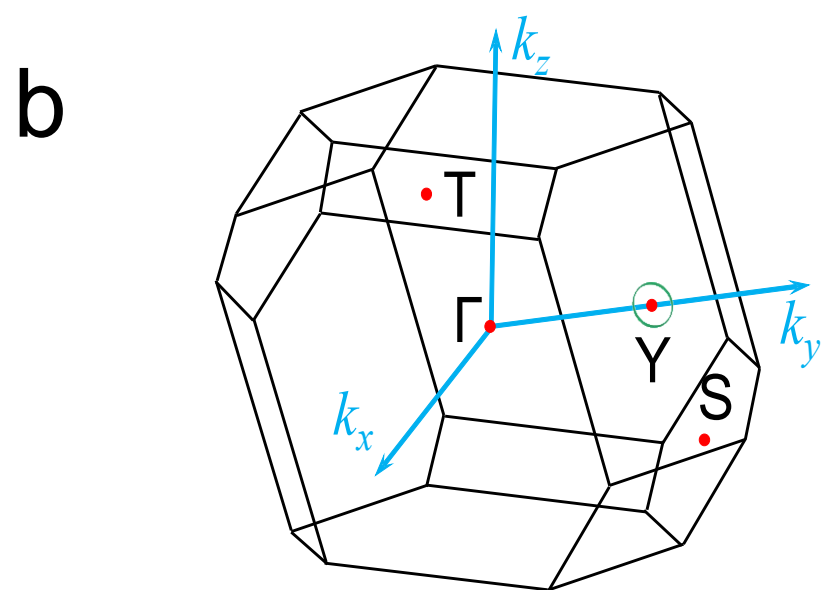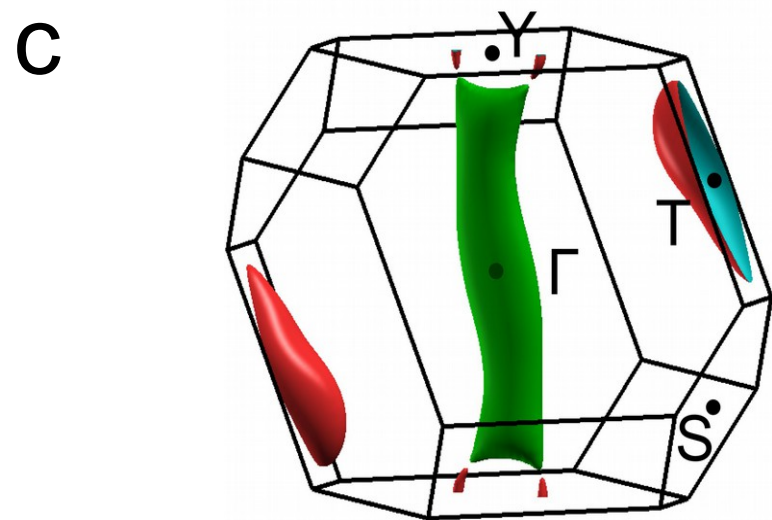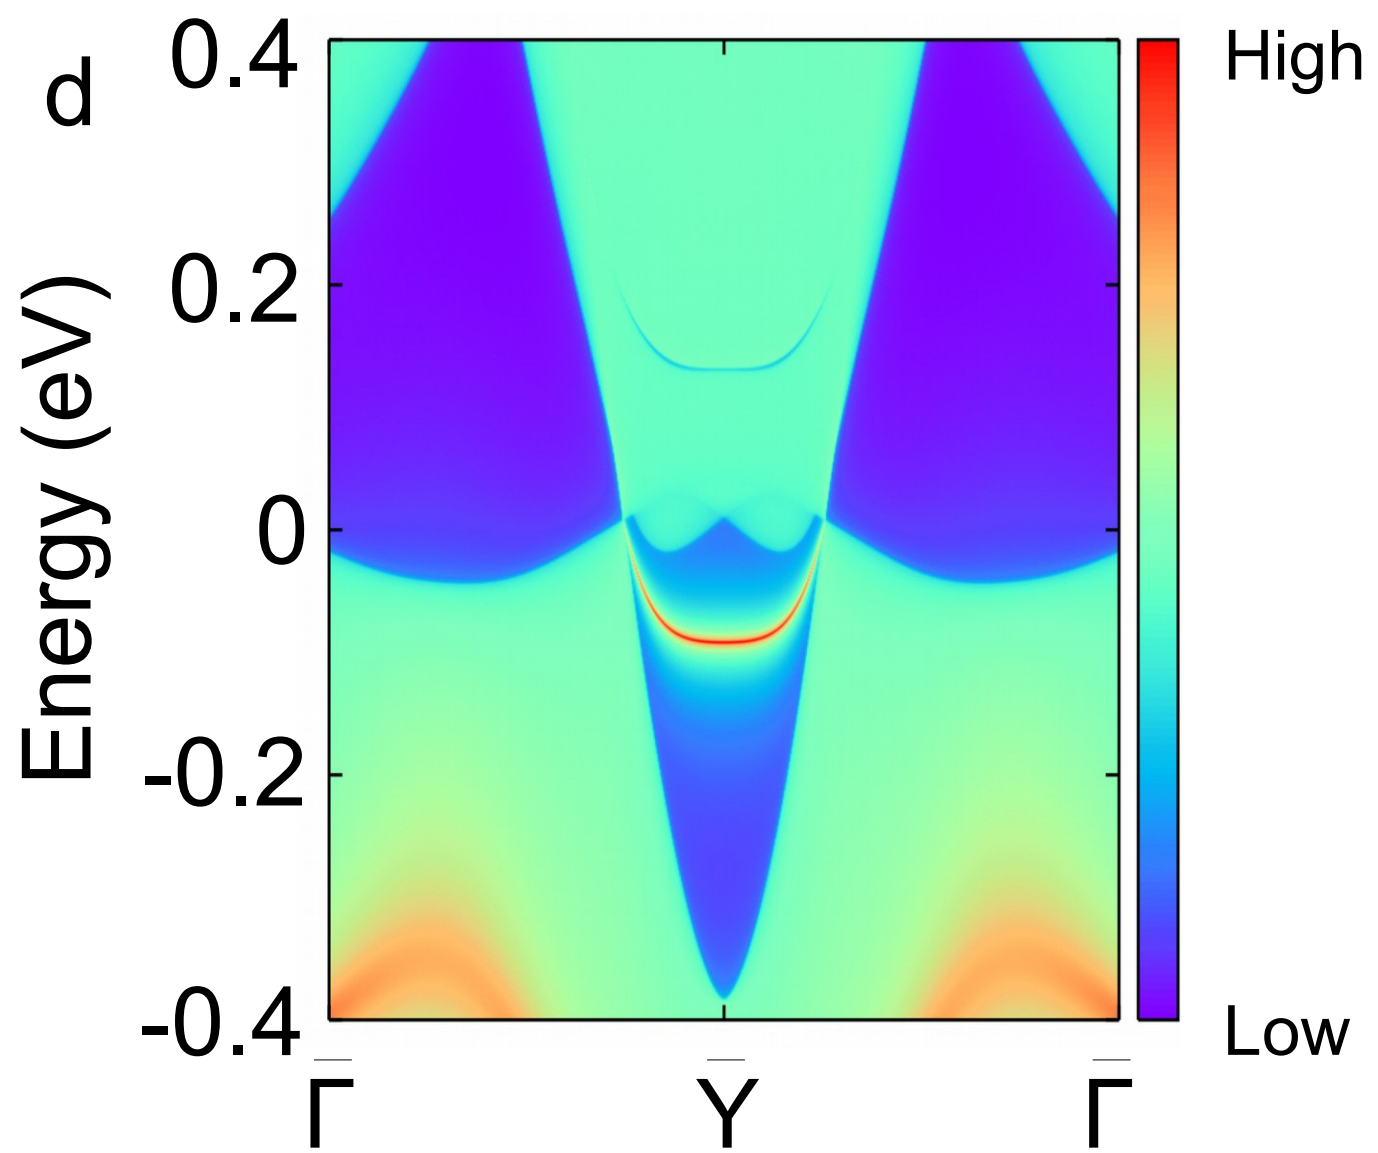

Supplement: Supplementary file 2 [file 153960c040db64cec0cb9b7e.pdf]

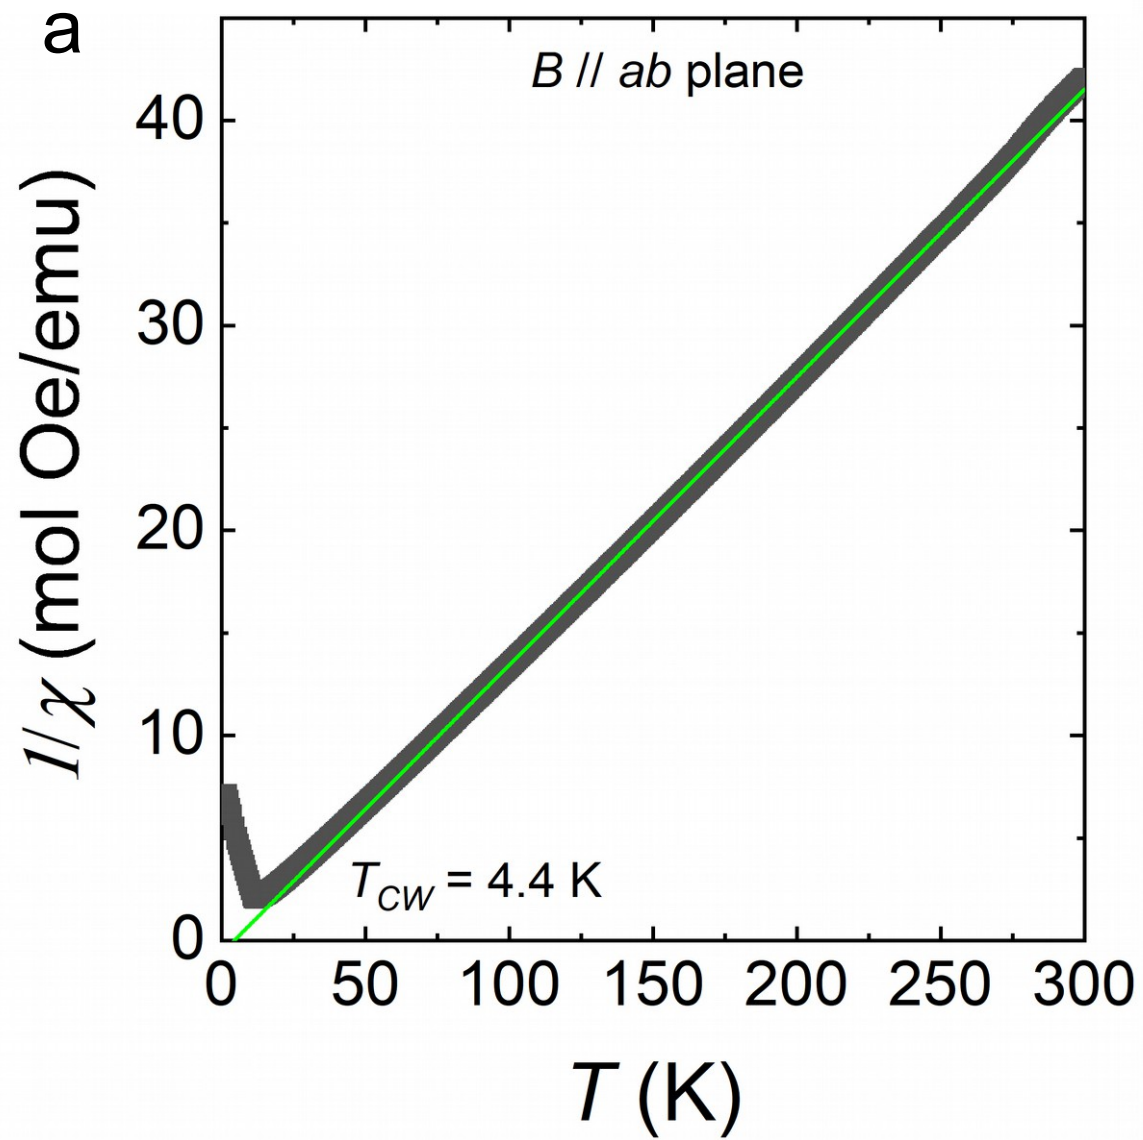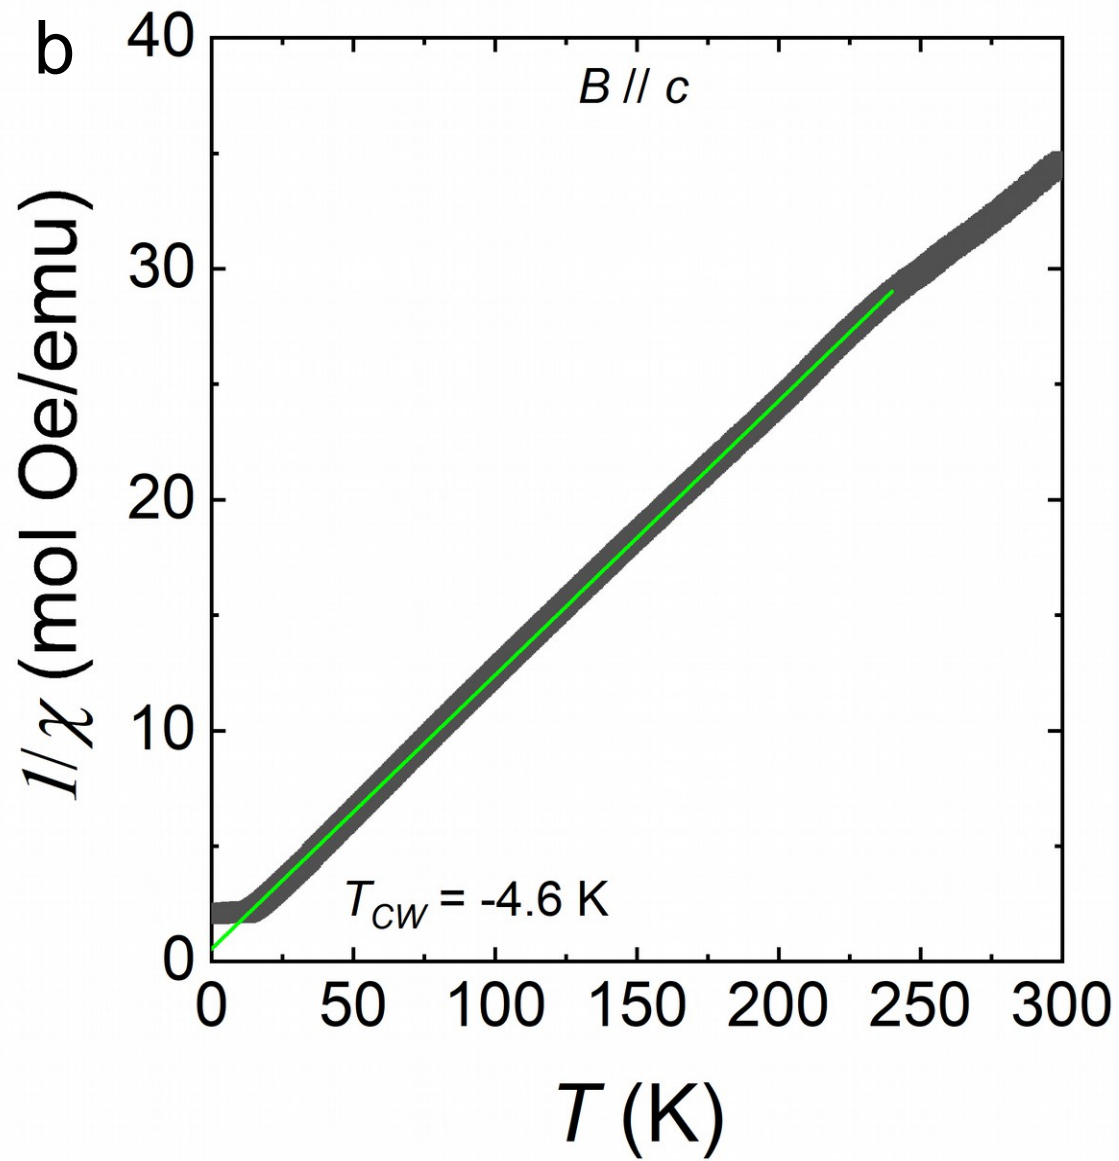

Supplement: Supplementary file 3 [file 52bb34e2230b5fdbdcb43179.pdf]

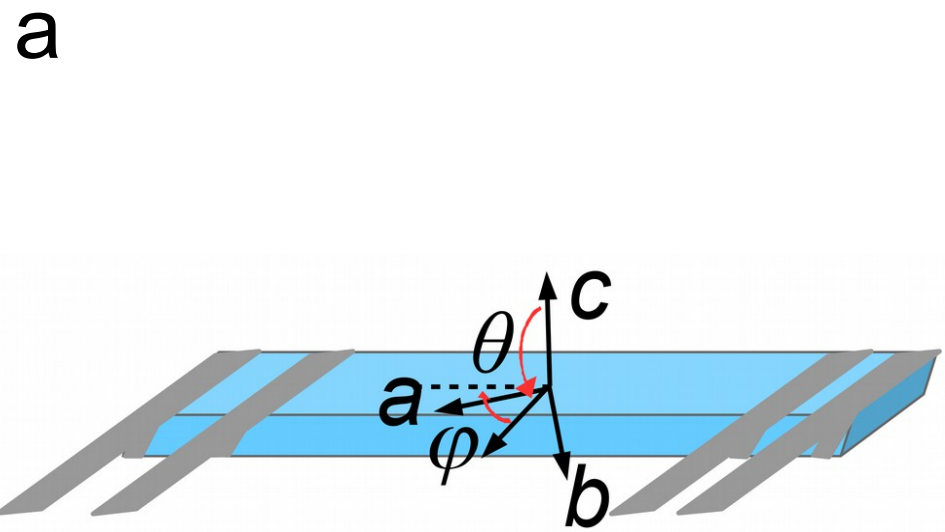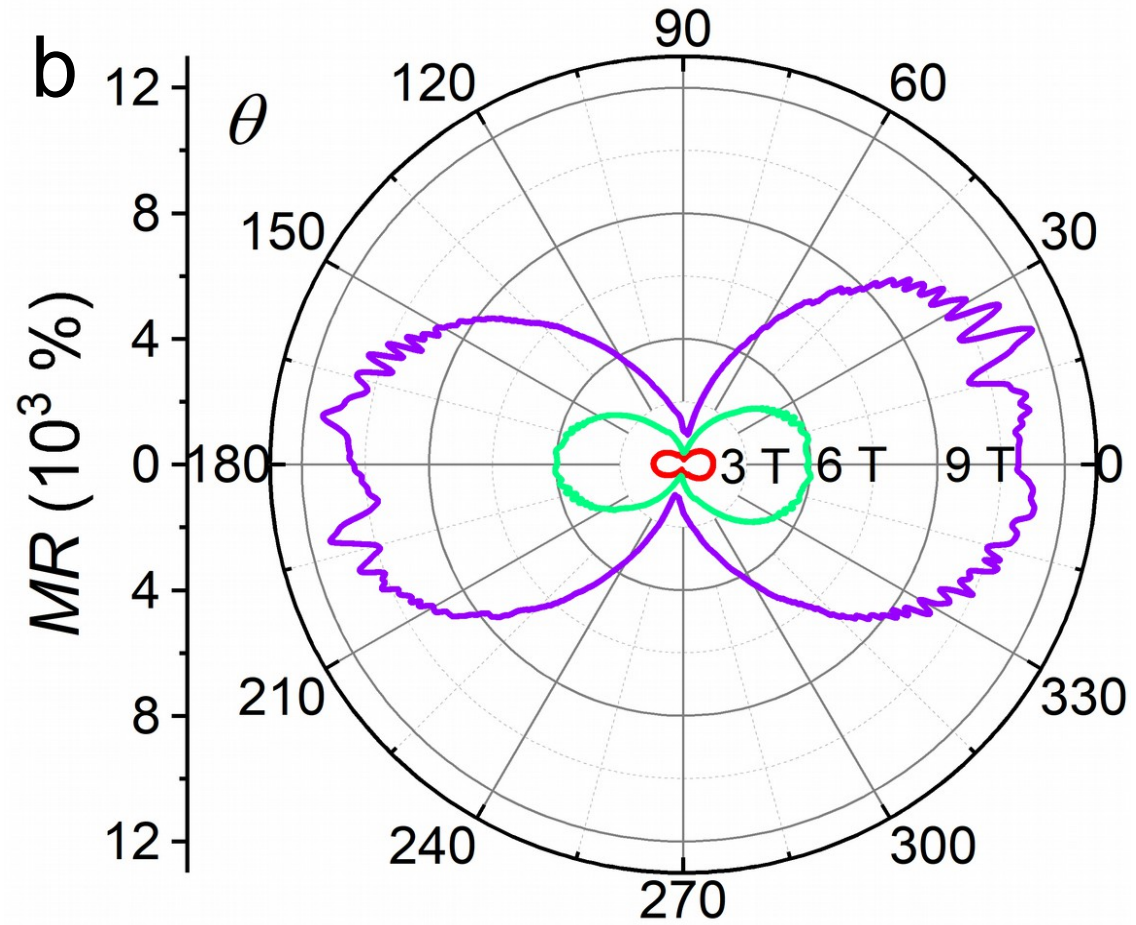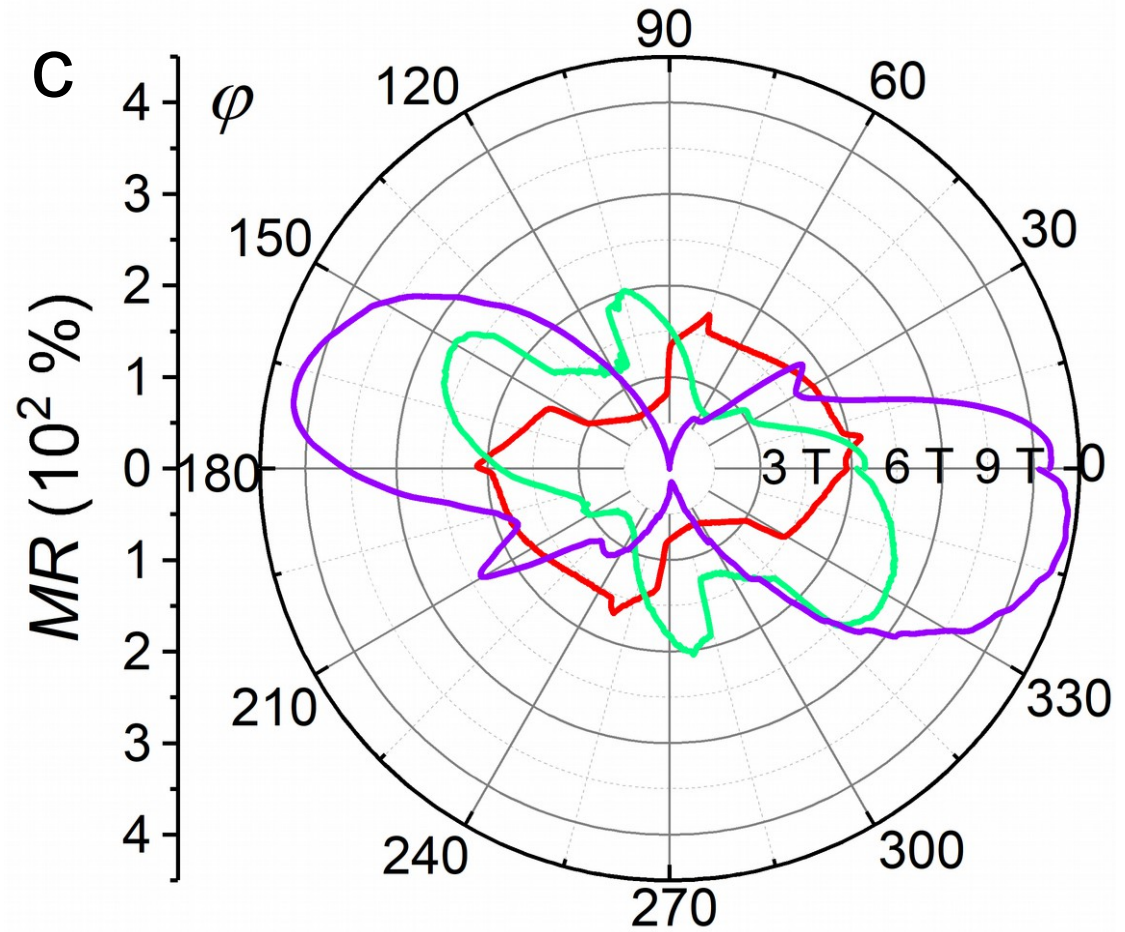

Supplement: Supplementary file 4 [file 551b085329978fe10364a482.pdf]

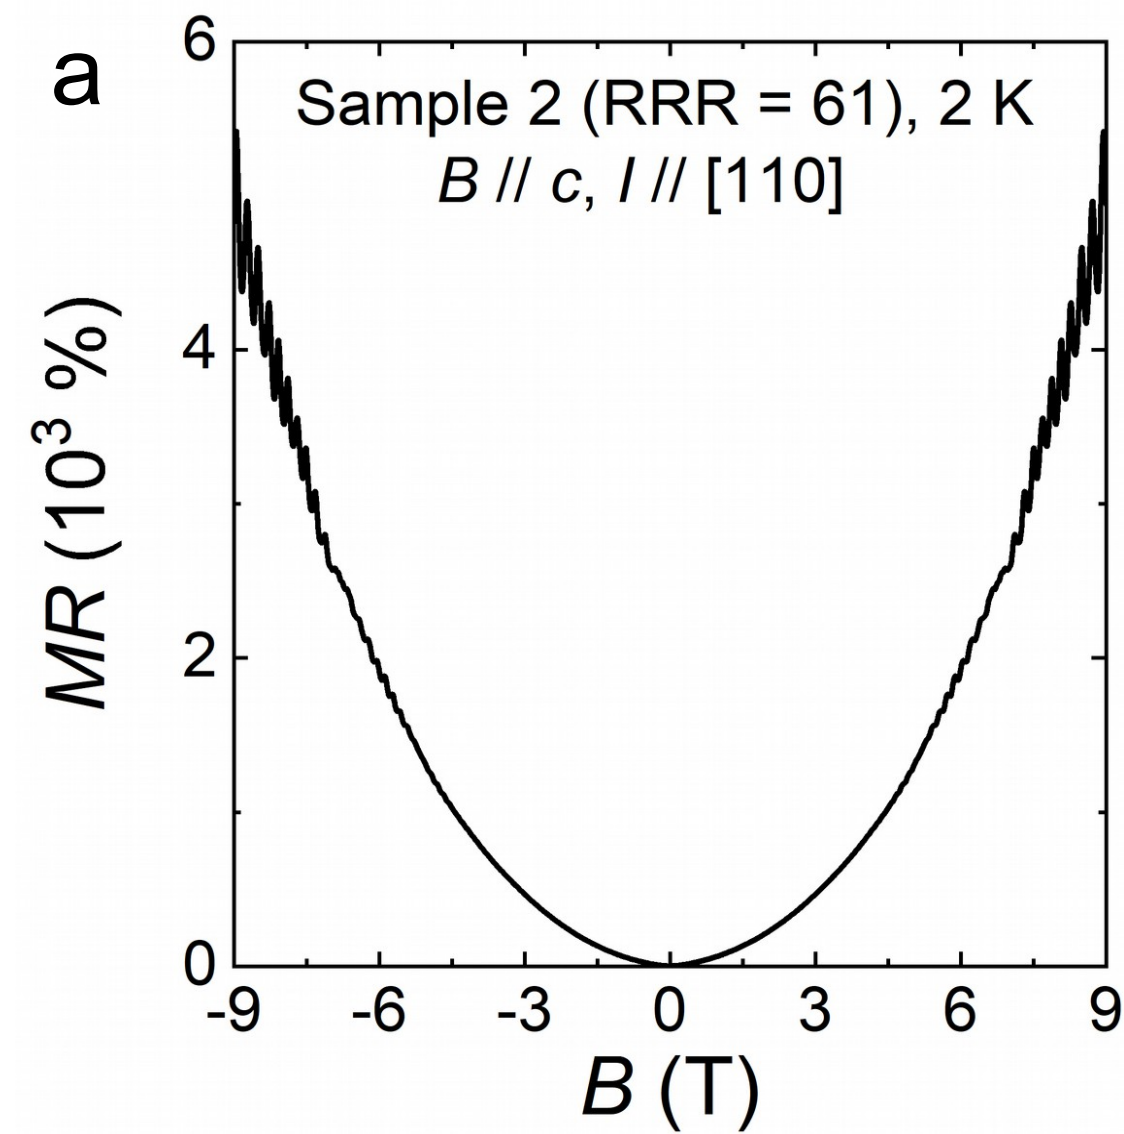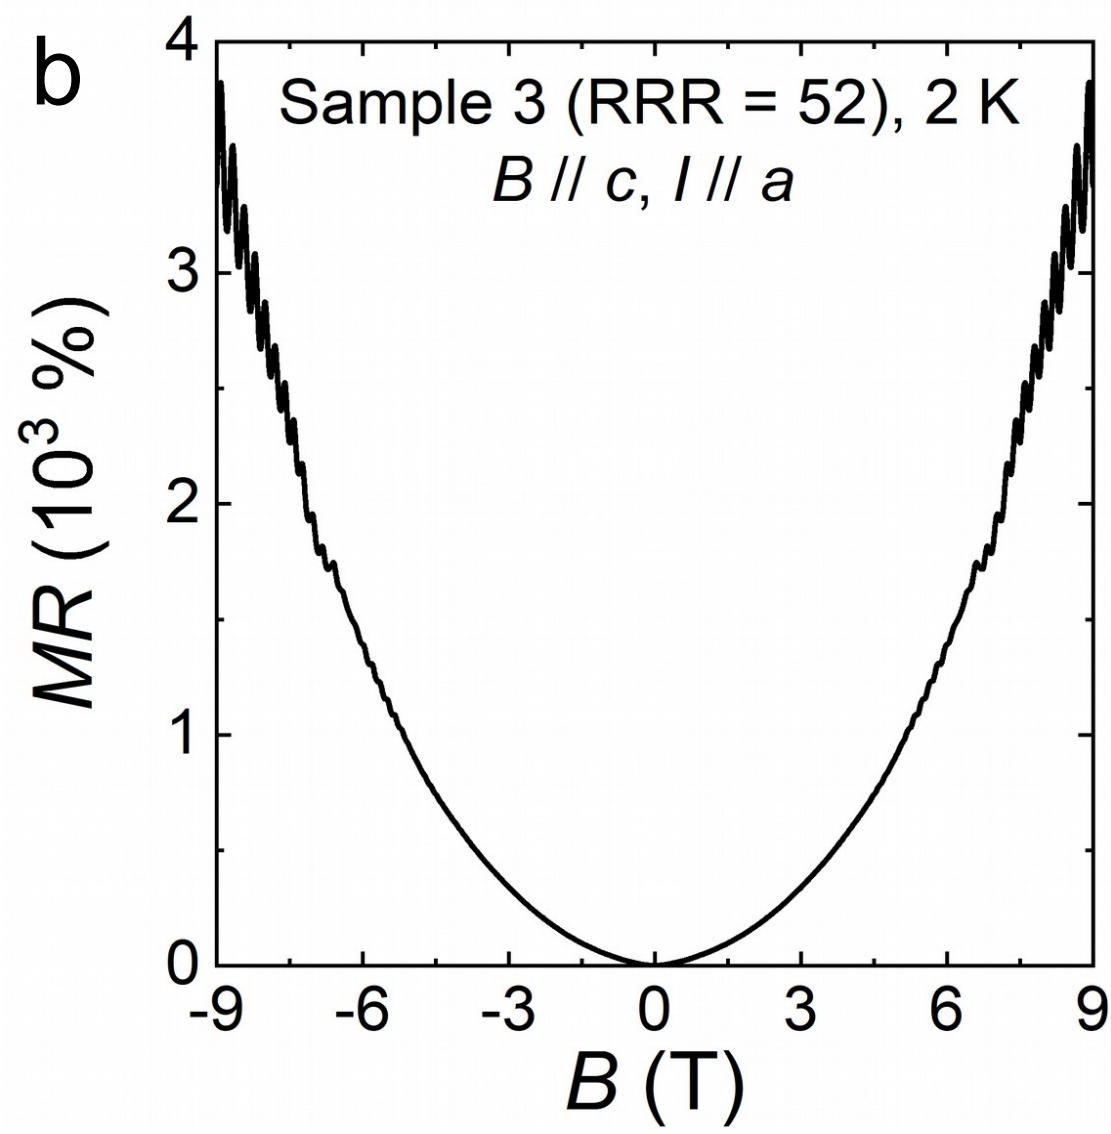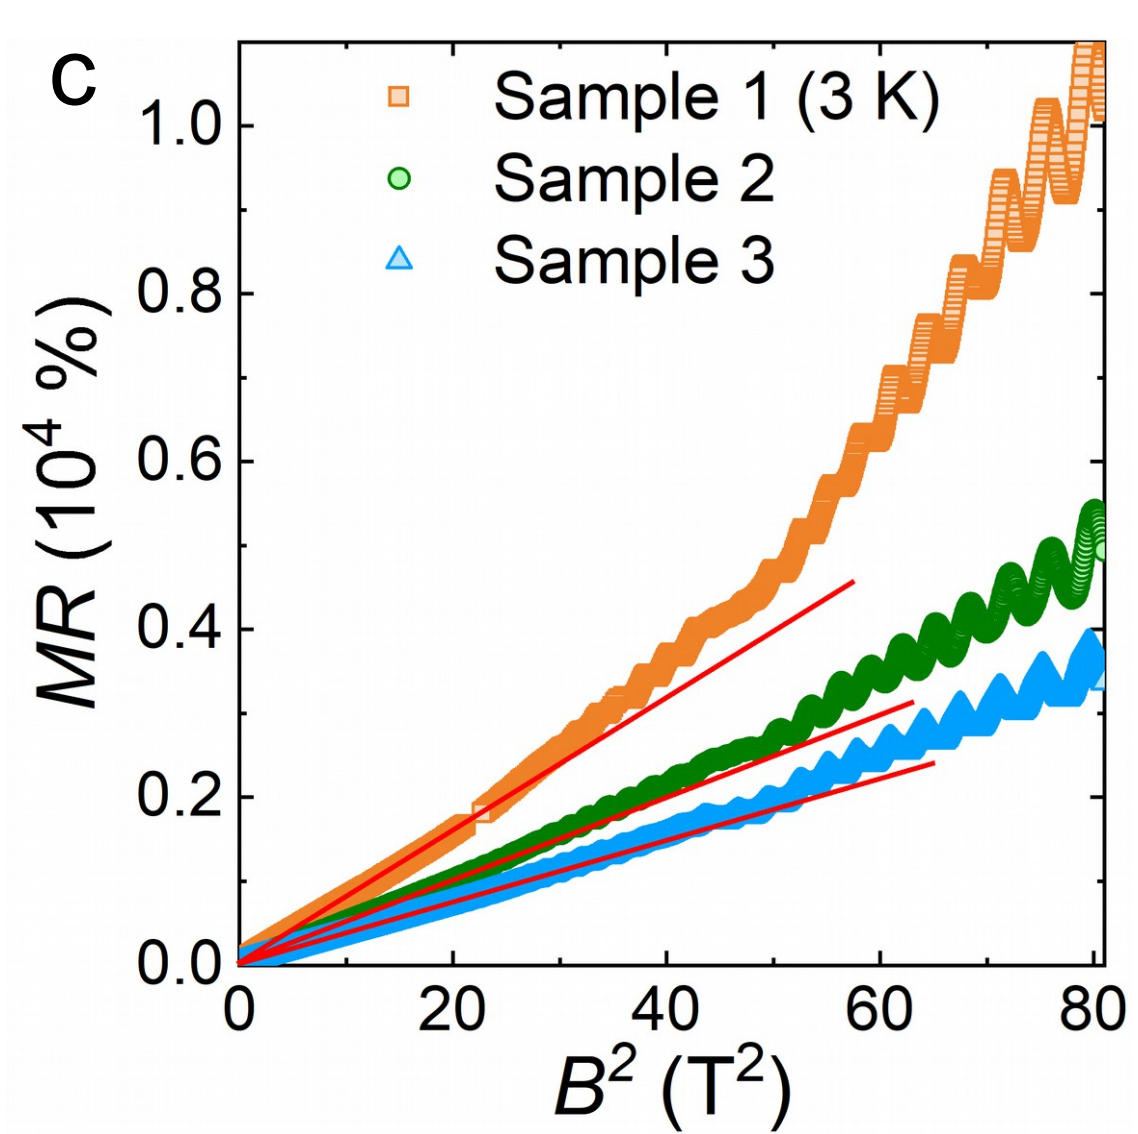

Supplement: Supplementary file 5 [file 5e2dd7601de73db9bd52f4a6.pdf]
